# Supplementary material
Source: PubMed Central journal article supplement (PMC9248028)

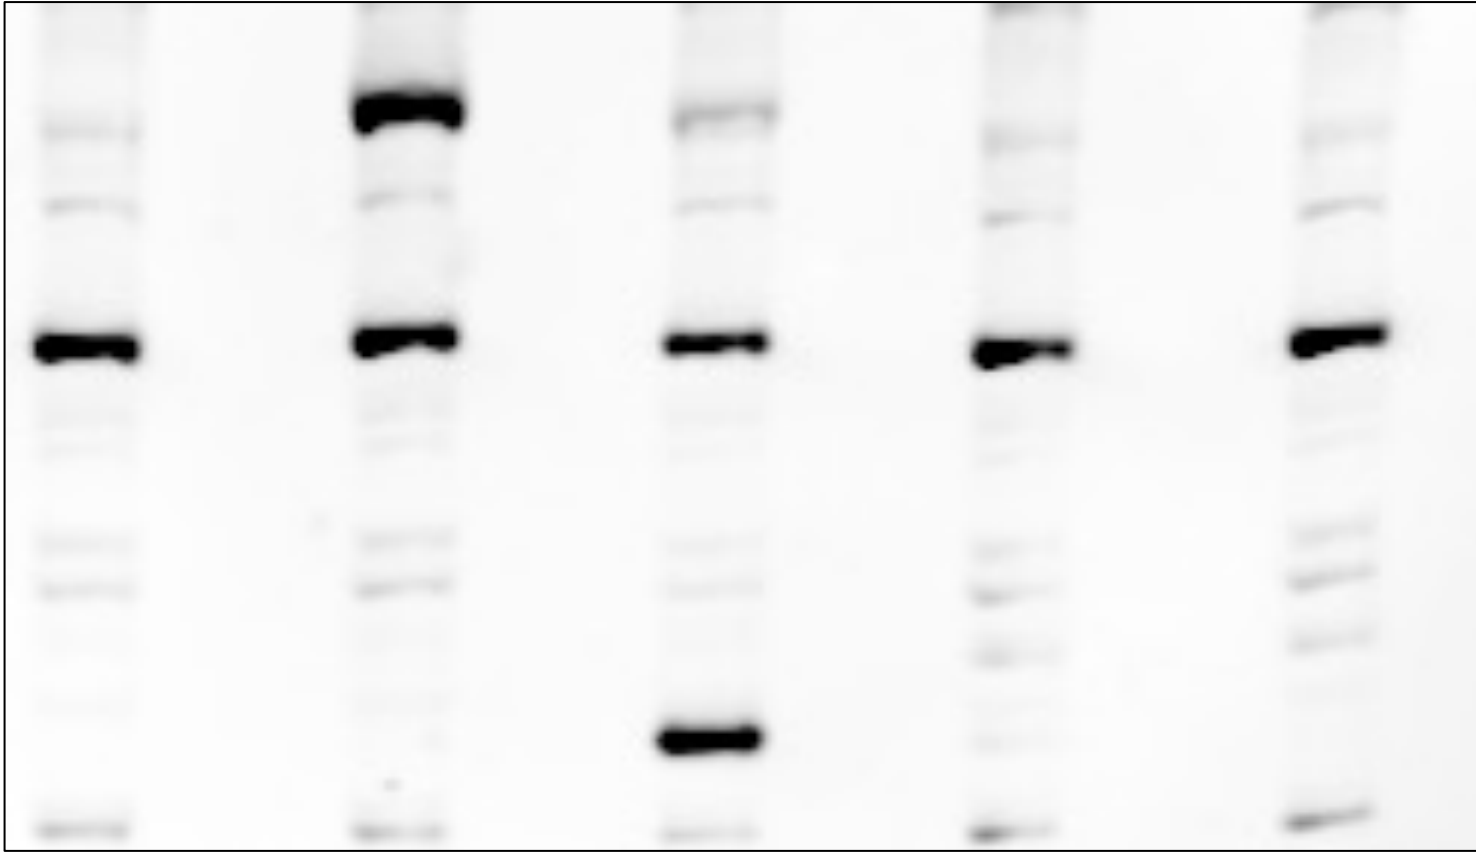

1F raw

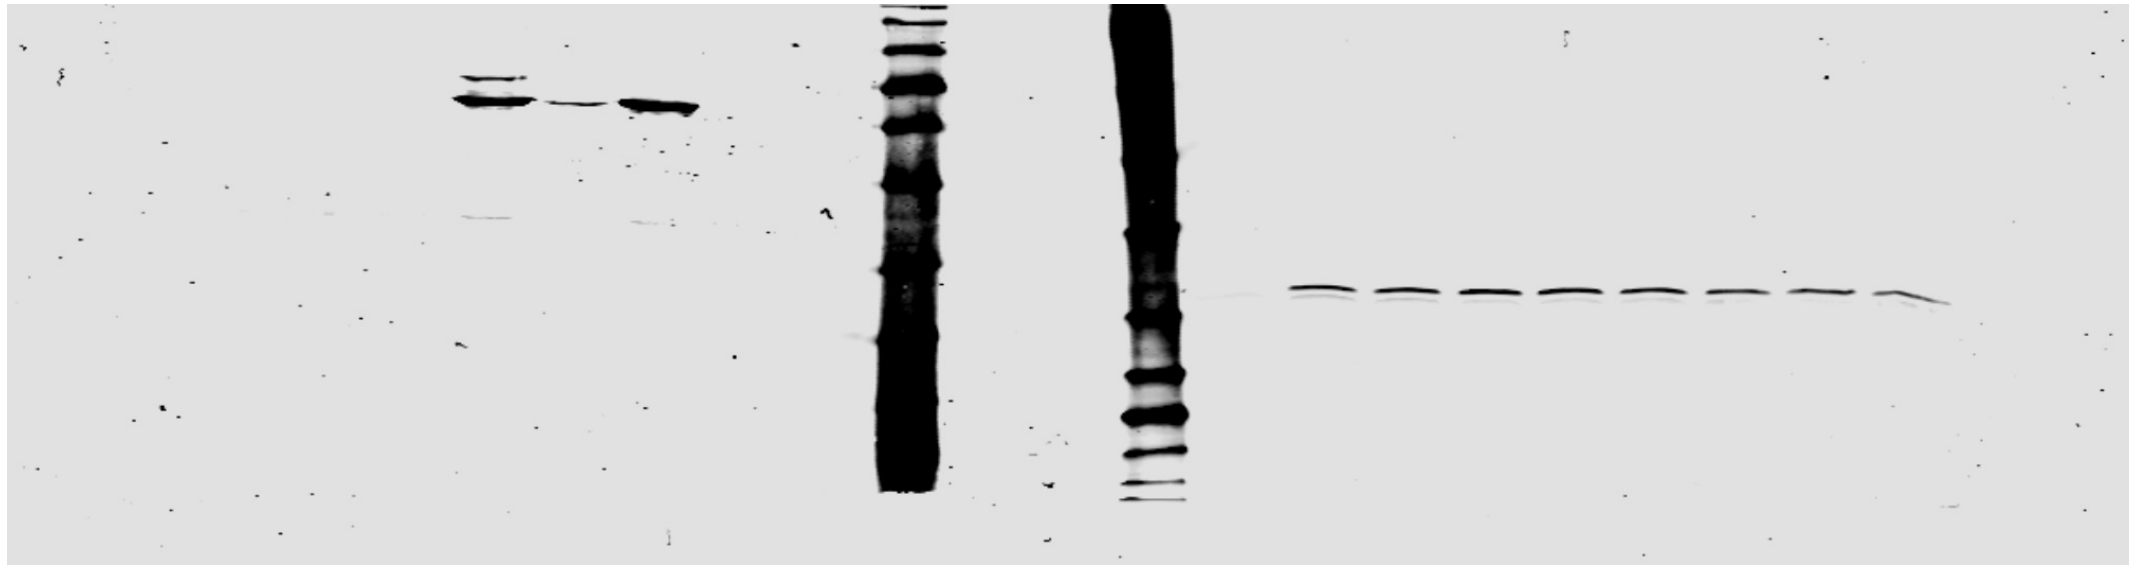

21 raw

FLuc

RLuc

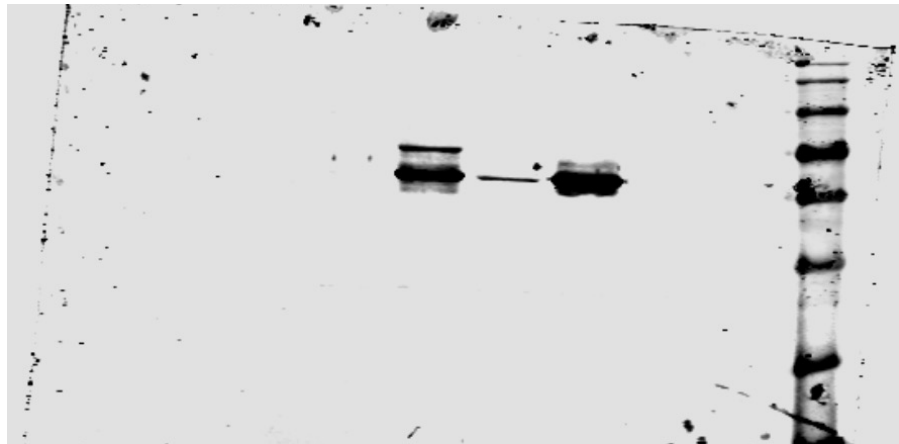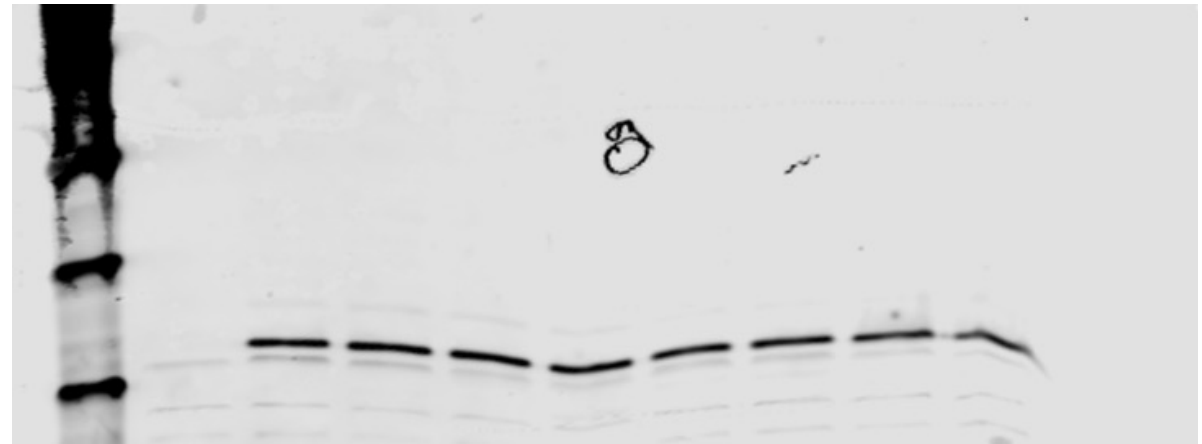

Extra repeat  
experiment

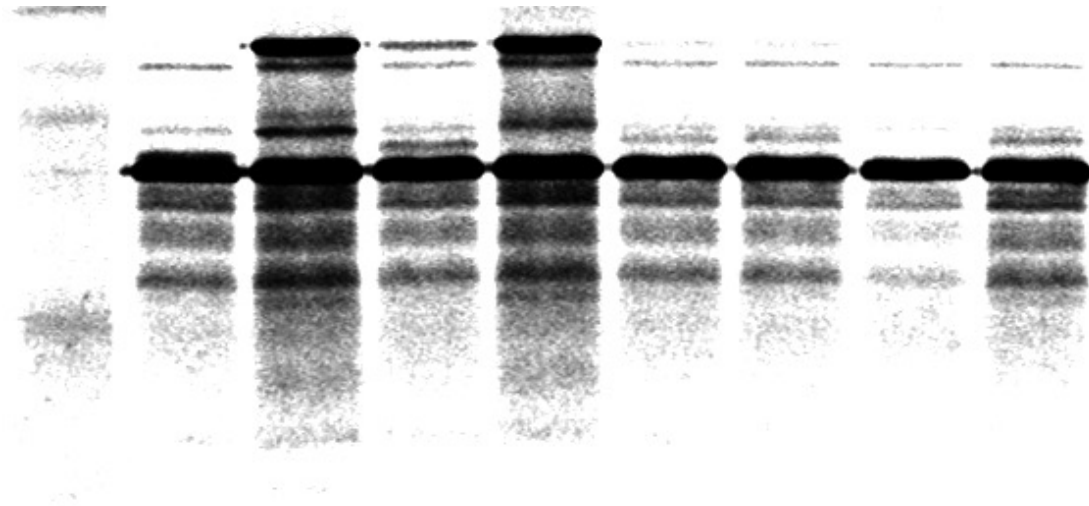

2J raw

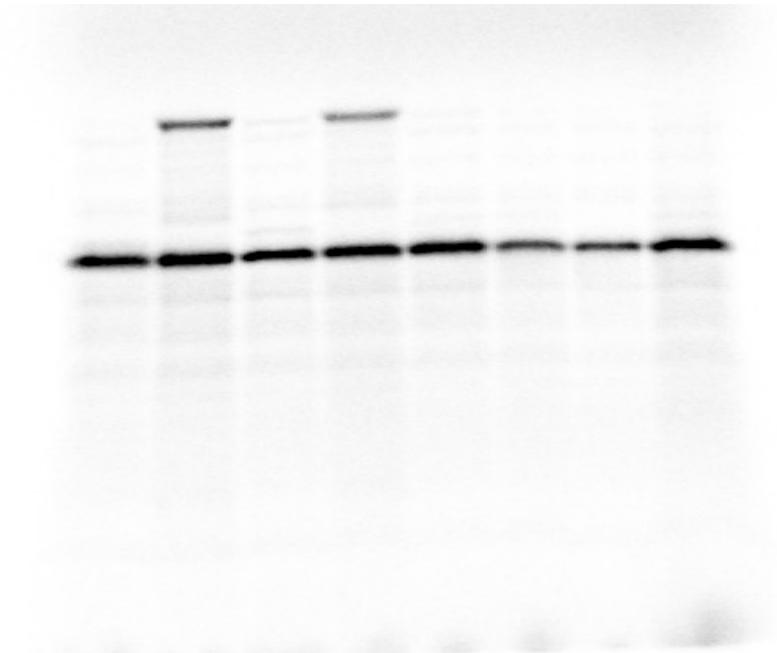

Extra repeat  
experiment

Supplement: NIHMS1816536-supplement-Supplemental_material.pdf [file NIHMS1816536-supplement-Supplemental_material.pdf]
